# Supplementary material
Source: PubMed Central journal article supplement (PMC59780)
Supplement: pnas_98_21_12132__1.pdf [file pnas_98_21_12132__1.pdf]

Supporting information for Herbert and Rich (2001) *Proc. Natl. Acad. Sci. USA* **98** (21), 12132–12137. (10.1073/pnas.211419898)

M246 and K744 were made by using the following primers with pK5FLAG reverse, following the Exsite protocol (Stratagene). The PCR product was gel purified, ligated, and transformed into *Escherichia coli*.

RADAR- M246-F  
CTG GCT GAA ATT AAG GAG AAA ATC TGT

RADAR K744  
GGG GAA TTC AAG GCA GAG CAG TTG GGT TTC GCA G

pK5-Flag Reverse  
CTT GTC ATC GTC GTC CTT GTA GTC

Mutagenesis was performed by using the following primers along with their complement by using Quikchange (Stratagene).

RADAR W303A  
GCC ACT CCT CCC ATC GCG TAC TTG ACG GAC AAG AAG CGT G

RADAR K504E  
GCT GAG GCT GGC AGC GAG AAA GTT GCT AAG CAG GA

RADAR K615E  
GTG AGT GCC CCC AGC GAG AAA GTA GCA AAG CAG ATG G

RADAR K723E  
C GTG TGT GCA CAC AGC GAG AAA CAG GGC AAG CAA GAC GCA G

RADAR W197A  
GA GTG GGG AAG CCT CCT TTG GCG AGC CTT GTG CCC TTA AGT C

RADAR HAE/QAA  
G ACT GTC AAT GAC TGC CAA GCT GCA ATC ATC TCC CGG A

RADAR HAE/HAG  
G ACT GTC AAT GAC TGC CAT GCC GGC ATC ATC TCC CGG AGA GG

RADAR SWAI 750  
G AAG GCA GAG CAG TTG GGA TTT AAA TAG GTA ACC CCA GTA ACC G

Forward (F) and reverse (R) sequencing primers for the pCI and pK5 vectors are shown.

pCIF

CTCCCAGTTCAATTACAGCTCTTAAG

pCIR

AAGCATTTCCTCACTGCATTCTAG

PCI-T7F

GGCTAGAGTACTTAATACGACTCAC

pK5-F

CAT CCA CTT TGC CTT TCT CTC CAC A
